# Supplementary material for: Access to MRI for patients with cardiac pacemakers and implantable cardioverter defibrillators
Source: PubMed Central journal article supplement (PMC8149430; doi:10.1136/openhrt-2021-001598), 2021-05-14
Supplement: openhrt-2021-001598supp001.pdf [file openhrt-2021-001598supp001.pdf]

| Number                                                                                                                         | Question                                                                                                                                                                                                                                                                                                                                                                                                                                                                                                                                                                                                                                                                                                                                                                |                                                                                                 |                                                                            |                                                                            |                                      |                                                                      |                                               |                                                                                                 |                                                                      |                                          |                                  |                                             |                               |
|--------------------------------------------------------------------------------------------------------------------------------|-------------------------------------------------------------------------------------------------------------------------------------------------------------------------------------------------------------------------------------------------------------------------------------------------------------------------------------------------------------------------------------------------------------------------------------------------------------------------------------------------------------------------------------------------------------------------------------------------------------------------------------------------------------------------------------------------------------------------------------------------------------------------|-------------------------------------------------------------------------------------------------|----------------------------------------------------------------------------|----------------------------------------------------------------------------|--------------------------------------|----------------------------------------------------------------------|-----------------------------------------------|-------------------------------------------------------------------------------------------------|----------------------------------------------------------------------|------------------------------------------|----------------------------------|---------------------------------------------|-------------------------------|
| 1                                                                                                                              | What is your role within the department                                                                                                                                                                                                                                                                                                                                                                                                                                                                                                                                                                                                                                                                                                                                 |                                                                                                 |                                                                            |                                                                            |                                      |                                                                      |                                               |                                                                                                 |                                                                      |                                          |                                  |                                             |                               |
| 2                                                                                                                              | Which hospital is your MRI unit based in, and as part of which NHS trust                                                                                                                                                                                                                                                                                                                                                                                                                                                                                                                                                                                                                                                                                                |                                                                                                 |                                                                            |                                                                            |                                      |                                                                      |                                               |                                                                                                 |                                                                      |                                          |                                  |                                             |                               |
| 3                                                                                                                              | Does your hospital have a cardiology department, including pacing clinic, on site                                                                                                                                                                                                                                                                                                                                                                                                                                                                                                                                                                                                                                                                                       |                                                                                                 |                                                                            |                                                                            |                                      |                                                                      |                                               |                                                                                                 |                                                                      |                                          |                                  |                                             |                               |
| 4                                                                                                                              | Is your unit aware that non-MR conditional devices can be scanned using appropriate safety measures                                                                                                                                                                                                                                                                                                                                                                                                                                                                                                                                                                                                                                                                     |                                                                                                 |                                                                            |                                                                            |                                      |                                                                      |                                               |                                                                                                 |                                                                      |                                          |                                  |                                             |                               |
| 5                                                                                                                              | Does your unit scan patients with; <b>MR-conditional pacemakers</b> (Y/N), <b>MR-conditional defibrillators</b> (Y/N), <b>non-MR conditional devices</b> (Y/N)                                                                                                                                                                                                                                                                                                                                                                                                                                                                                                                                                                                                          |                                                                                                 |                                                                            |                                                                            |                                      |                                                                      |                                               |                                                                                                 |                                                                      |                                          |                                  |                                             |                               |
| 6                                                                                                                              | Where do you scan device patients                                                                                                                                                                                                                                                                                                                                                                                                                                                                                                                                                                                                                                                                                                                                       |                                                                                                 |                                                                            |                                                                            |                                      |                                                                      |                                               |                                                                                                 |                                                                      |                                          |                                  |                                             |                               |
| 7                                                                                                                              | Where is device re-programming performed                                                                                                                                                                                                                                                                                                                                                                                                                                                                                                                                                                                                                                                                                                                                |                                                                                                 |                                                                            |                                                                            |                                      |                                                                      |                                               |                                                                                                 |                                                                      |                                          |                                  |                                             |                               |
| 8                                                                                                                              | Does your unit scan the thorax in cardiac device patients                                                                                                                                                                                                                                                                                                                                                                                                                                                                                                                                                                                                                                                                                                               |                                                                                                 |                                                                            |                                                                            |                                      |                                                                      |                                               |                                                                                                 |                                                                      |                                          |                                  |                                             |                               |
| 9                                                                                                                              | How many scans has your unit performed in patients with in-situ pacemakers/defibrillators (of all types) in the preceding 12 months                                                                                                                                                                                                                                                                                                                                                                                                                                                                                                                                                                                                                                     |                                                                                                 |                                                                            |                                                                            |                                      |                                                                      |                                               |                                                                                                 |                                                                      |                                          |                                  |                                             |                               |
| 10                                                                                                                             | How many of your scans are in patients with non-MRI conditional pacemakers/defibrillator systems                                                                                                                                                                                                                                                                                                                                                                                                                                                                                                                                                                                                                                                                        |                                                                                                 |                                                                            |                                                                            |                                      |                                                                      |                                               |                                                                                                 |                                                                      |                                          |                                  |                                             |                               |
| 11                                                                                                                             | How many scans do you anticipate delivering in the upcoming 12 months                                                                                                                                                                                                                                                                                                                                                                                                                                                                                                                                                                                                                                                                                                   |                                                                                                 |                                                                            |                                                                            |                                      |                                                                      |                                               |                                                                                                 |                                                                      |                                          |                                  |                                             |                               |
| 12                                                                                                                             | <table border="1"> <tr> <td><i>Written standard operating procedure in place</i></td> <td><i>CXR prior to MRI to look for abandoned leads</i></td> <td><i>Request discussed with cardiologist/ pacing clinic prior to booking</i></td> <td><i>ALS trained personnel on site</i></td> </tr> <tr> <td><i>Cardiologist present on site</i></td> <td><i>Cardiologist present in department</i></td> <td><i>Cardiac device physiologist/ technician present on site</i></td> <td><i>Cardiac device physiologist/ technician present in department</i></td> </tr> <tr> <td><i>Radiologist present in department</i></td> <td><i>Continuous ECG monitoring</i></td> <td><i>Continuous pulse oximetry monitoring</i></td> <td><i>Other (please specify)</i></td> </tr> </table> | <i>Written standard operating procedure in place</i>                                            | <i>CXR prior to MRI to look for abandoned leads</i>                        | <i>Request discussed with cardiologist/ pacing clinic prior to booking</i> | <i>ALS trained personnel on site</i> | <i>Cardiologist present on site</i>                                  | <i>Cardiologist present in department</i>     | <i>Cardiac device physiologist/ technician present on site</i>                                  | <i>Cardiac device physiologist/ technician present in department</i> | <i>Radiologist present in department</i> | <i>Continuous ECG monitoring</i> | <i>Continuous pulse oximetry monitoring</i> | <i>Other (please specify)</i> |
|                                                                                                                                | <i>Written standard operating procedure in place</i>                                                                                                                                                                                                                                                                                                                                                                                                                                                                                                                                                                                                                                                                                                                    | <i>CXR prior to MRI to look for abandoned leads</i>                                             | <i>Request discussed with cardiologist/ pacing clinic prior to booking</i> | <i>ALS trained personnel on site</i>                                       |                                      |                                                                      |                                               |                                                                                                 |                                                                      |                                          |                                  |                                             |                               |
|                                                                                                                                | <i>Cardiologist present on site</i>                                                                                                                                                                                                                                                                                                                                                                                                                                                                                                                                                                                                                                                                                                                                     | <i>Cardiologist present in department</i>                                                       | <i>Cardiac device physiologist/ technician present on site</i>             | <i>Cardiac device physiologist/ technician present in department</i>       |                                      |                                                                      |                                               |                                                                                                 |                                                                      |                                          |                                  |                                             |                               |
| <i>Radiologist present in department</i>                                                                                       | <i>Continuous ECG monitoring</i>                                                                                                                                                                                                                                                                                                                                                                                                                                                                                                                                                                                                                                                                                                                                        | <i>Continuous pulse oximetry monitoring</i>                                                     | <i>Other (please specify)</i>                                              |                                                                            |                                      |                                                                      |                                               |                                                                                                 |                                                                      |                                          |                                  |                                             |                               |
| Which of the following precautions are taken when scanning patients with MRI conditional devices? Tick as many as appropriate. |                                                                                                                                                                                                                                                                                                                                                                                                                                                                                                                                                                                                                                                                                                                                                                         |                                                                                                 |                                                                            |                                                                            |                                      |                                                                      |                                               |                                                                                                 |                                                                      |                                          |                                  |                                             |                               |
| 13                                                                                                                             | <table border="1"> <tr> <td><i>Written confirmation that no other imaging modality will answer clinical question</i></td> <td><i>Written patient consent</i></td> <td><i>Discussion with cardiologist regarding individual risk of MRI</i></td> <td><i>MDT discussion</i></td> </tr> <tr> <td><i>Written confirmation that scan results will change management</i></td> <td><i>Cardiologist present in the department</i></td> <td><i>Local list of indications which are always appropriate (e.g. suspected cord compression)</i></td> <td><i>Other (please specify)</i></td> </tr> </table>                                                                                                                                                                           | <i>Written confirmation that no other imaging modality will answer clinical question</i>        | <i>Written patient consent</i>                                             | <i>Discussion with cardiologist regarding individual risk of MRI</i>       | <i>MDT discussion</i>                | <i>Written confirmation that scan results will change management</i> | <i>Cardiologist present in the department</i> | <i>Local list of indications which are always appropriate (e.g. suspected cord compression)</i> | <i>Other (please specify)</i>                                        |                                          |                                  |                                             |                               |
|                                                                                                                                | <i>Written confirmation that no other imaging modality will answer clinical question</i>                                                                                                                                                                                                                                                                                                                                                                                                                                                                                                                                                                                                                                                                                | <i>Written patient consent</i>                                                                  | <i>Discussion with cardiologist regarding individual risk of MRI</i>       | <i>MDT discussion</i>                                                      |                                      |                                                                      |                                               |                                                                                                 |                                                                      |                                          |                                  |                                             |                               |
| <i>Written confirmation that scan results will change management</i>                                                           | <i>Cardiologist present in the department</i>                                                                                                                                                                                                                                                                                                                                                                                                                                                                                                                                                                                                                                                                                                                           | <i>Local list of indications which are always appropriate (e.g. suspected cord compression)</i> | <i>Other (please specify)</i>                                              |                                                                            |                                      |                                                                      |                                               |                                                                                                 |                                                                      |                                          |                                  |                                             |                               |
| What additional precautions are taken when scanning patients with non-MRI conditional devices? Tick as many as appropriate.    |                                                                                                                                                                                                                                                                                                                                                                                                                                                                                                                                                                                                                                                                                                                                                                         |                                                                                                 |                                                                            |                                                                            |                                      |                                                                      |                                               |                                                                                                 |                                                                      |                                          |                                  |                                             |                               |
| 14                                                                                                                             | Have you scanned any of the following patients; abandoned/capped leads, devices implanted <6 weeks, abdominal pacing systems, epicardial pacing leads, non-MRI-conditional pacemaker dependent ICD patients?                                                                                                                                                                                                                                                                                                                                                                                                                                                                                                                                                            |                                                                                                 |                                                                            |                                                                            |                                      |                                                                      |                                               |                                                                                                 |                                                                      |                                          |                                  |                                             |                               |
| 15                                                                                                                             | Have you ever had any complications scanning any pacemaker/defibrillator patients? Please see Supplementary Data for potential complication details.                                                                                                                                                                                                                                                                                                                                                                                                                                                                                                                                                                                                                    |                                                                                                 |                                                                            |                                                                            |                                      |                                                                      |                                               |                                                                                                 |                                                                      |                                          |                                  |                                             |                               |
| 16                                                                                                                             | Did these complications arise whilst adhering to local protocols?                                                                                                                                                                                                                                                                                                                                                                                                                                                                                                                                                                                                                                                                                                       |                                                                                                 |                                                                            |                                                                            |                                      |                                                                      |                                               |                                                                                                 |                                                                      |                                          |                                  |                                             |                               |
| 17                                                                                                                             | <p>What is the reason(s) for not scanning patients with MR-conditional devices? Tick as many as appropriate.</p> <ul style="list-style-type: none"> <li>- Unaware of MR-conditional devices</li> <li>- Concerns regarding patient risk</li> <li>- Lack of training</li> <li>- Lack of support from cardiology/pacing clinic</li> <li>- Lack of available monitoring equipment</li> <li>- Lack of tariff/concerns regarding funding</li> <li>- Lack of capacity on scanner</li> <li>- MRI provided by 3rd party who do not permit device scanning</li> <li>- Device MRI provided by another hospital within the Trust</li> <li>- Lack of time to review patient/device data before scan</li> <li>- Scan unimportant/no referrals</li> </ul>                              |                                                                                                 |                                                                            |                                                                            |                                      |                                                                      |                                               |                                                                                                 |                                                                      |                                          |                                  |                                             |                               |
| 18                                                                                                                             | Would you ever feel comfortable scanning non-MR-conditional devices                                                                                                                                                                                                                                                                                                                                                                                                                                                                                                                                                                                                                                                                                                     |                                                                                                 |                                                                            |                                                                            |                                      |                                                                      |                                               |                                                                                                 |                                                                      |                                          |                                  |                                             |                               |
| 19                                                                                                                             | What would encourage you/your unit to start scanning these patients; formal training, national guidelines (e.g. Royal College of Radiology, British Cardiovascular Society), better cardiology-radiology collaboration, better support from pacing technicians, dedicated tariff/funding agreement, logistical support to review device information, more referrals.                                                                                                                                                                                                                                                                                                                                                                                                    |                                                                                                 |                                                                            |                                                                            |                                      |                                                                      |                                               |                                                                                                 |                                                                      |                                          |                                  |                                             |                               |
| 20                                                                                                                             | Would you be interested in further training on MRI scanning in patients with cardiac devices                                                                                                                                                                                                                                                                                                                                                                                                                                                                                                                                                                                                                                                                            |                                                                                                 |                                                                            |                                                                            |                                      |                                                                      |                                               |                                                                                                 |                                                                      |                                          |                                  |                                             |                               |

### Supplementary Data Table 1

Online questionnaire sent to all NHS MRI units in England.

| Category | Complication |
|----------|--------------|
|----------|--------------|

|              |                                                                                                                                                                                                                                                                                                                                                                                                                                                                                                                                                           |
|--------------|-----------------------------------------------------------------------------------------------------------------------------------------------------------------------------------------------------------------------------------------------------------------------------------------------------------------------------------------------------------------------------------------------------------------------------------------------------------------------------------------------------------------------------------------------------------|
| <b>Major</b> | <ul style="list-style-type: none"><li>- Death</li><li>- Generator failure requiring replacement</li><li>- Significant battery depletion requiring generator replacement</li><li>- Lead displacement requiring repositioning</li><li>- Inhibition of necessary pacing</li><li>- Sustained arrhythmia attributable to current induction in pacemaker or ICD system leads (i.e. co-incident with MRI sequence initiation, rhythmic pulse sequences, or sequence termination)</li><li>- Inappropriate delivery of anti-tachycardia pacing or shocks</li></ul> |
| <b>Minor</b> | <ul style="list-style-type: none"><li>- Power-on-reset</li><li>- Significant lead parameter (pacing threshold, impedance or sensing) changes requiring changes in programmed sensitivity or pacing output</li></ul>                                                                                                                                                                                                                                                                                                                                       |

### Supplementary Data Table 2

Classification of potential complications from MRI scanning in CIED patients (derived from the MagnaSafe Registry (19)).

| Map Number | Sustainability & Transformation Partnership                  | STP Population (2016) | Total MRI Scan Number in CIED Patients |         | Total MRI Scan Number in CIED Patients |         |
|------------|--------------------------------------------------------------|-----------------------|----------------------------------------|---------|----------------------------------------|---------|
|            |                                                              |                       | 2014/15                                | 2018/19 | 2014/15                                | 2018/19 |
| 1          | Norfolk and Waveney                                          | 1,100,000             | 10                                     | 20      | 0.91                                   | 1.82    |
| 2          | Cambridgeshire and Peterborough                              | 900,000               | 40                                     | 86      | 4.44                                   | 9.56    |
| 3          | Suffolk and North East Essex                                 | 1,000,000             | 20                                     | 20      | 2.00                                   | 2.00    |
| 4          | Milton Keynes, Bedfordshire and Luton                        | 1,000,000             | 0                                      | 0       | 0.00                                   | 0.00    |
| 5          | Hertfordshire and West Essex                                 | 1,600,000             | 30                                     | 70      | 1.88                                   | 4.38    |
| 6          | Mid and South Essex                                          | 1,200,000             | 20                                     | 75      | 1.67                                   | 6.25    |
| 7          | North West London                                            | 2,500,000             | 80                                     | 429     | 3.20                                   | 17.16   |
| 8          | North London                                                 | 1,600,000             | 20                                     | 70      | 1.25                                   | 4.38    |
| 9          | North East London                                            | 2,200,000             | 40                                     | 362     | 1.82                                   | 16.45   |
| 10         | South West London                                            | 1,700,000             | 0                                      | 15      | 0.00                                   | 0.88    |
| 11         | South East London                                            | 2,000,000             | 20                                     | 250     | 1.00                                   | 12.50   |
| 12         | Shropshire, Telford and Wrekin                               | 500,000               | 0                                      | 0       | 0.00                                   | 0.00    |
| 13         | Staffordshire & Stoke-on-Trent                               | 1,200,000             | 20                                     | 102     | 1.67                                   | 8.50    |
| 14         | Derbyshire                                                   | 1,000,000             | 0                                      | 0       | 0.00                                   | 0.00    |
| 15         | Nottingham & Nottinghamshire                                 | 1,100,000             | 10                                     | 100     | 0.91                                   | 9.09    |
| 16         | Lincolnshire                                                 | 800,000               | 20                                     | 20      | 2.50                                   | 2.50    |
| 17         | Leicester, Leicestershire and Rutland                        | 1,100,000             | 50                                     | 50      | 4.55                                   | 4.55    |
| 18         | The Black Country & West Birmingham                          | 1,500,000             | 50                                     | 20      | 3.33                                   | 1.33    |
| 19         | Birmingham & Solihull                                        | 1,300,000             | 20                                     | 200     | 1.54                                   | 15.38   |
| 20         | Herefordshire and Worcestershire                             | 800,000               | 20                                     | 10      | 2.50                                   | 1.25    |
| 21         | Coventry and Warwickshire                                    | 1,000,000             | 20                                     | 90      | 2.00                                   | 9.00    |
| 22         | Northamptonshire                                             | 800,000               | 0                                      | 0       | 0.00                                   | 0.00    |
| 23         | West, North and East Cumbria                                 | 300,000               | 10                                     | 0       | 3.33                                   | 0.00    |
| 24         | Northumberland, Tyne and Wear, and North Durham              | 1,700,000             | 10                                     | 75      | 0.59                                   | 4.41    |
| 25         | Durham, Darlington, Teesside, Hambleton, Richmond and Whitby | 1,200,000             | 20                                     | 200     | 1.67                                   | 16.67   |
| 26         | West Yorkshire and Harrogate                                 | 2,500,000             | 60                                     | 255     | 2.40                                   | 10.20   |
| 27         | Humber, Coast and Vale                                       | 1,700,000             | 30                                     | 275     | 1.76                                   | 16.18   |
| 28         | South Yorkshire and Bassetlaw                                | 1,500,000             | 10                                     | 100     | 0.67                                   | 6.67    |
| 29         | Lancashire and South Cumbria                                 | 1,700,000             | 0                                      | 124     | 0.00                                   | 7.29    |
| 30         | Greater Manchester                                           | 2,800,000             | 100                                    | 250     | 3.57                                   | 8.93    |
| 31         | Cheshire and Merseyside                                      | 2,600,000             | 70                                     | 260     | 2.69                                   | 10.00   |
| 32         | Buckinghamshire, Oxfordshire and Berkshire West              | 1,800,000             | 20                                     | 85      | 1.11                                   | 4.72    |
| 33         | Frimley Health                                               | 800,000               | 0                                      | 46      | 0.00                                   | 5.75    |
| 34         | Hampshire and the Isle of Wight                              | 1,900,000             | 20                                     | 79      | 1.05                                   | 4.16    |
| 35         | Surrey Heartlands                                            | 900,000               | 10                                     | 50      | 1.11                                   | 5.56    |
| 36         | Sussex and East Surrey                                       | 1,800,000             | 30                                     | 140     | 1.67                                   | 7.78    |
| 37         | Kent and Medway                                              | 1,900,000             | 30                                     | 160     | 1.58                                   | 8.42    |
| 38         | Gloucestershire                                              | 600,000               | 10                                     | 50      | 1.67                                   | 8.33    |
| 39         | Bristol, North Somerset and South Gloucestershire            | 1,000,000             | 50                                     | 120     | 5.00                                   | 12.00   |
| 40         | Bath and North East Somerset, Swindon and Wiltshire          | 900,000               | 10                                     | 104     | 1.11                                   | 11.56   |
| 41         | Somerset                                                     | 600,000               | 40                                     | 80      | 6.67                                   | 13.33   |
| 42         | Dorset                                                       | 800,000               | 20                                     | 170     | 2.50                                   | 21.25   |

|           |                                  |           |    |     |      |       |
|-----------|----------------------------------|-----------|----|-----|------|-------|
| <b>43</b> | Devon                            | 1,200,000 | 20 | 184 | 1.67 | 15.33 |
| <b>44</b> | Cornwall and the Isles of Scilly | 600,000   | 0  | 100 | 0.00 | 16.67 |

**Supplementary Data Table 3**

National provision of MRI scans to CIED patients by sustainability and transformation partnership. This supplementary data table demonstrates the raw data used for Figure 3.
